# Supplementary material for: SPaRTAN, a computational framework for linking cell-surface receptors to transcriptional regulators
Source: PubMed Central journal article supplement (PMC8464045; doi:10.1093/nar/gkab745), 2021-09-09
Supplement: gkab745_supplemental_file.pdf [file gkab745_supplemental_file.pdf]

# Supplementary material: a computational framework for linking cell-surface receptors to transcriptional regulators

## Supplementary Figures

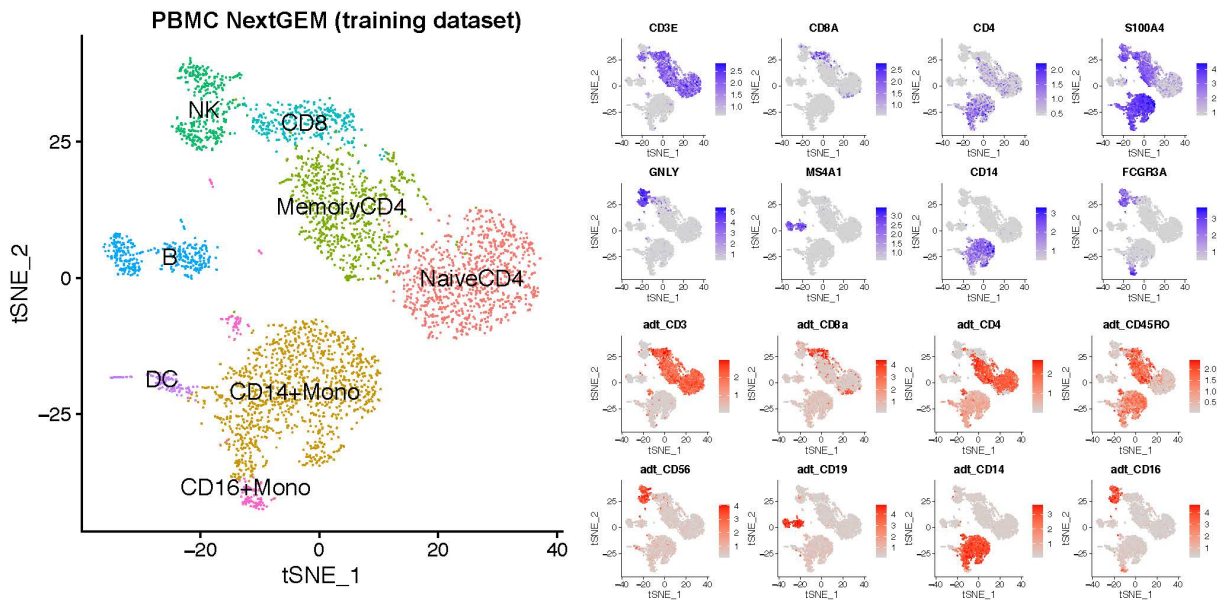

**Supplementary Fig. 1:** Transcriptome-based clustering of 4,073 CITE-seq single-cell expression profiles of PBMCs (Next GEM, training dataset) reveals distinct cell populations. Cell types can be discerned by marker gene expression. B, CD20<sup>+</sup>CD19<sup>+</sup> B cells; Naïve CD4, CD62L<sup>+</sup>CD45RA<sup>+</sup>CCR7<sup>+</sup>CD4<sup>+</sup> T cells; Memory CD4, CD62L<sup>-</sup>CD45RA<sup>+</sup>CCR7<sup>-</sup>CD4<sup>+</sup>CD3<sup>+</sup> T cells; CD8 T, CD8<sup>+</sup>CD3<sup>+</sup> T cells; NK, CD56<sup>+</sup>CD3<sup>+</sup>CD4<sup>-</sup>CD8<sup>-</sup> cells; CD14<sup>+</sup> Mono, CD14<sup>+</sup>HLA-DR<sup>+</sup>CD3<sup>-</sup>CD19<sup>-</sup>; CD16<sup>+</sup> Mono, CD16<sup>+</sup>HLA-DR<sup>+</sup>CD3<sup>-</sup>CD19<sup>-</sup>; DC, CD14<sup>-</sup>HLADR<sup>+</sup>CD123<sup>-</sup>CD11c<sup>+</sup>. mRNA (blue) and corresponding ADT (red) signal for the CITE-seq antibody panel projected on the t-SNE plot from the panel.

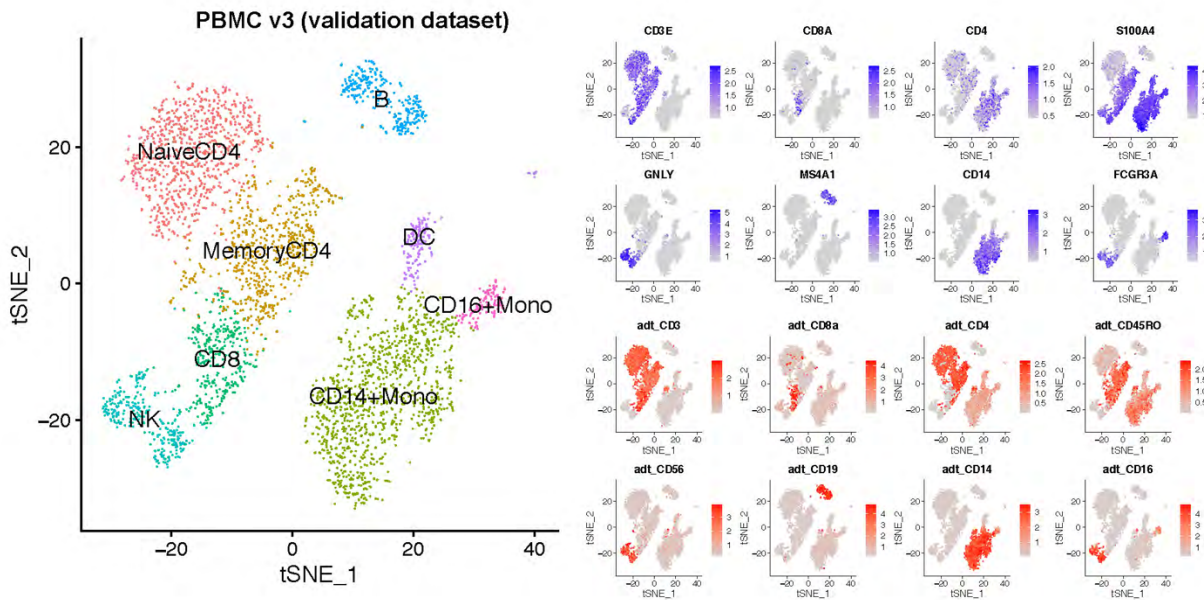

**Supplementary Fig. 2:** Transcriptome-based clustering of 3,891 CITE-seq single-cell expression profiles of PBMCs (10x Genomics, v3 Chemistry, validation dataset) reveals distinct cell populations. Cell types can be discerned by marker gene expression. B, CD20<sup>+</sup>CD19<sup>+</sup> B cells; Naïve CD4, CD62L<sup>+</sup>CD45RA<sup>+</sup>CCR7<sup>+</sup>CD4<sup>+</sup> T cells; Memory CD4, CD62L<sup>-</sup>CD45RA<sup>-</sup>CCR7<sup>-</sup>CD4<sup>+</sup>CD3<sup>+</sup> T cells; CD8 T, CD8<sup>+</sup>CD3<sup>+</sup> T cells; NK, CD56<sup>+</sup>CD3<sup>+</sup>CD4<sup>-</sup>CD8<sup>+</sup> cells; CD14+ Mono, CD14<sup>+</sup>HLA-DR<sup>+</sup>CD3<sup>-</sup>CD19<sup>-</sup>; CD16+ Mono, CD16<sup>+</sup>HLA-DR<sup>+</sup>CD3<sup>-</sup>CD19<sup>-</sup>; DC, CD14<sup>+</sup>HLADR<sup>+</sup>CD123<sup>-</sup>CD11c<sup>+</sup>. mRNA (blue) and corresponding ADT (red) signal for the CITE-seq antibody panel projected on the t-SNE plot from the panel.

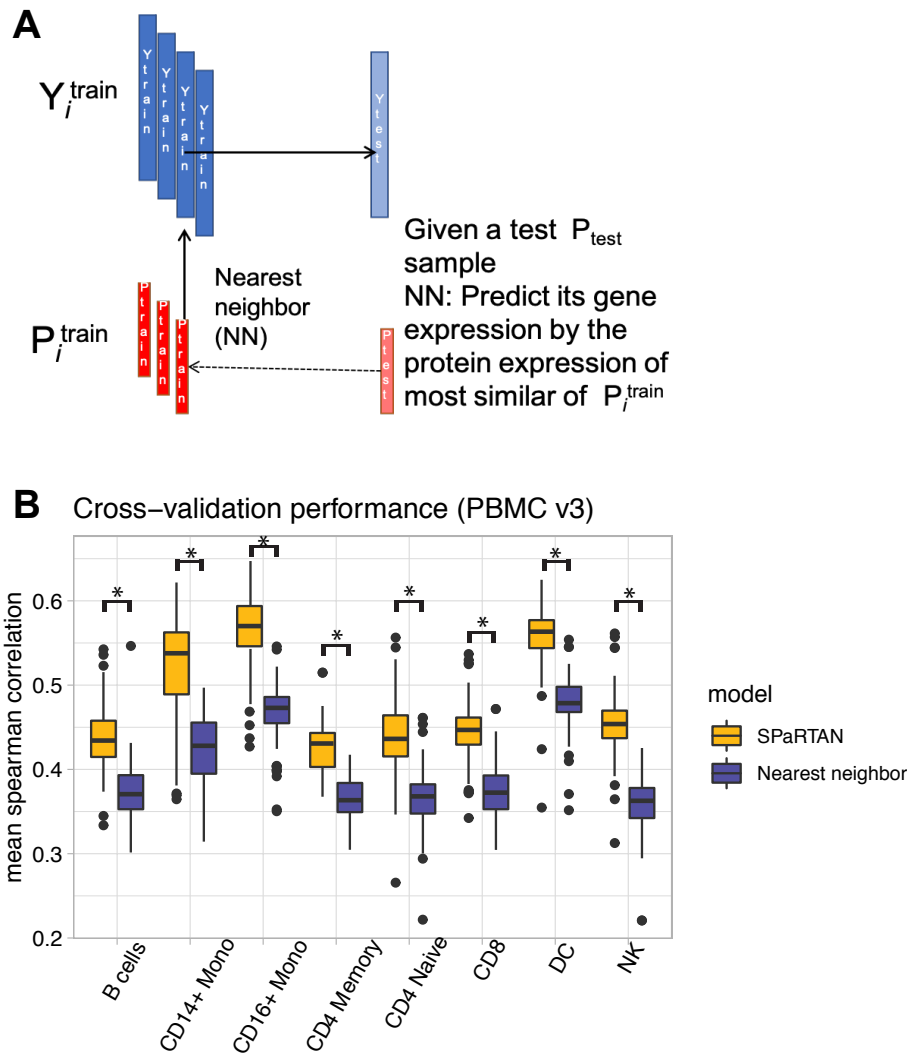

**Supplementary Fig. 3: (A)** Representative figure for nearest neighbor approach. Neighbors are chosen based on similarity of protein expression profiles (input space). In fivefold cross-validation on held-out cells, based on protein expression nearest neighbor, where the training domain that is most similar to each test example on the basis of protein expression is considered the nearest neighbor, and this neighbor's gene expression is used for prediction. We used Euclidean distance in the protein space to identify the nearest neighbor. Essentially, high accuracy for the prediction problem is not the critical goal but rather being able to learn important molecular connections in diverse cellular contexts, specifically the connectivity of surface receptors and TFs whose activity explains gene expression differences among cells. Therefore, we mainly want to show that the model does more than memorize obvious cell-to-cell similarity in the training data (hence we use the nearest neighbor comparison). **(B)** SPaRTAN accurately predicts relative gene expression on held-out PBMC (10x Genomics, v3 Chemistry, validation dataset) cells for each cell-type. Performance of the SPaRTAN models for each PBMC cell type compared to nearest neighbor methods. Boxplots showing mean Spearman correlations between predicted and actual gene expression using the SPaRTAN model (light blue); nearest neighbor by surface protein expression profile (blue) ( $y$ -axis) for PBMC CITE-seq data from 10x Genomics (v3 Chemistry) each cell-type ( $P < 0.001$ , one-sided Wilcoxon's signed-rank test).

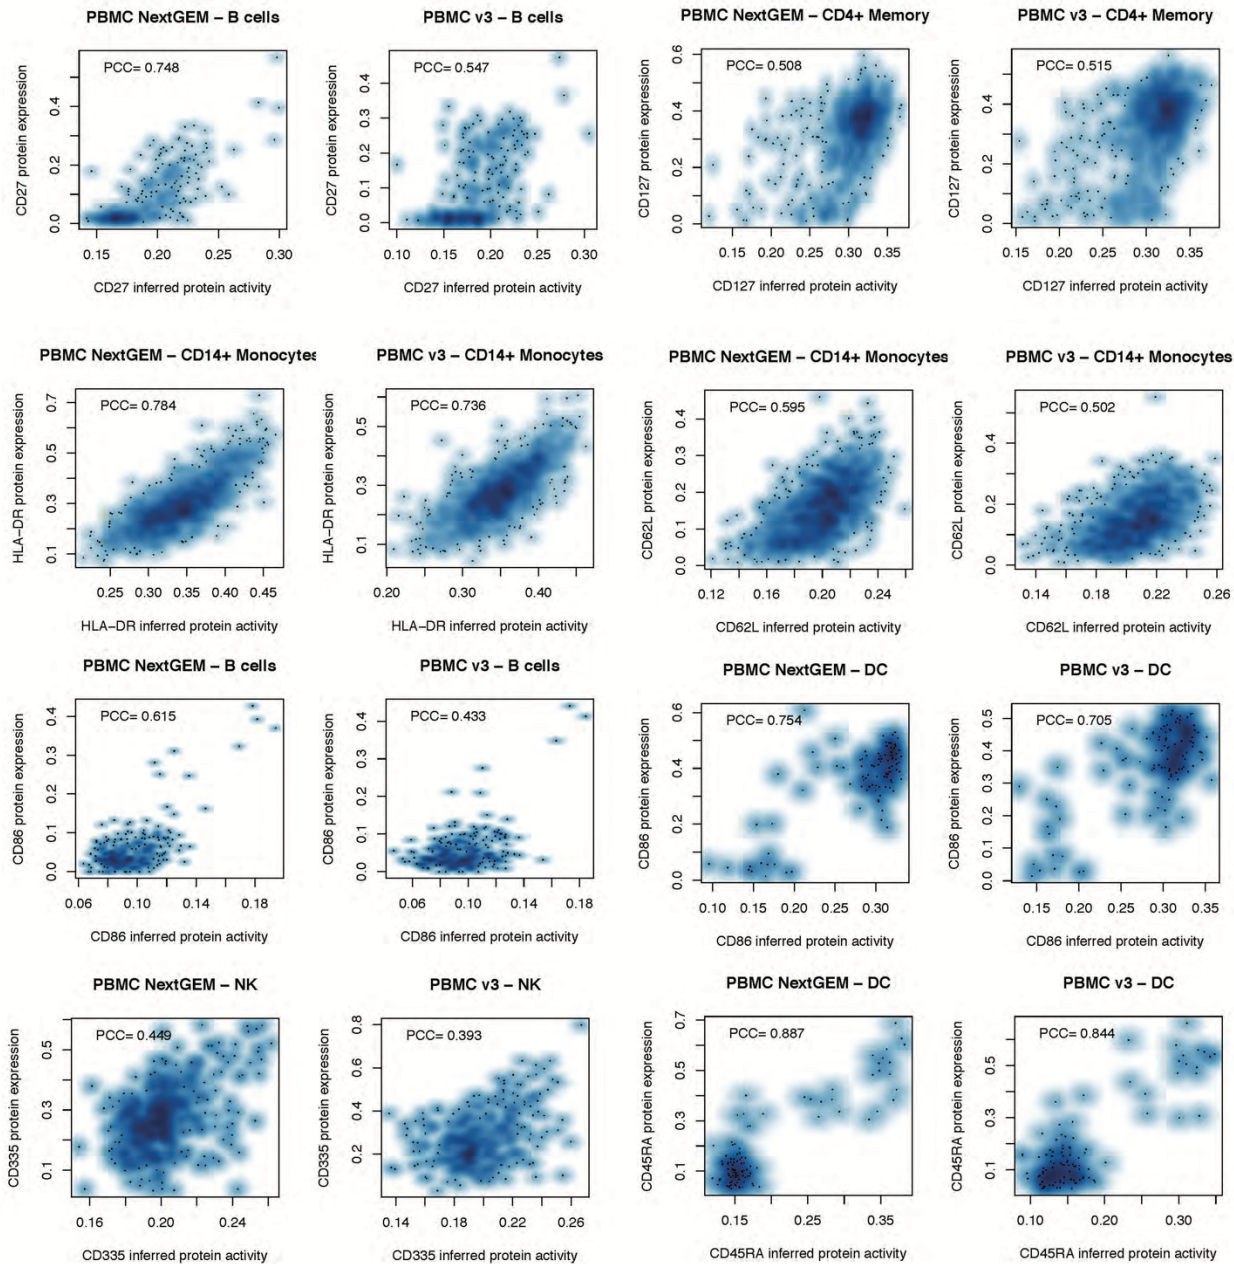

**Supplementary Fig. 4: Correlation of inferred and measured protein expression.** Pearson's correlation coefficient (PCC) of inferred and measured surface protein expression in training PBMC cohort (left) and validation PBMC cohort (right); for validation data, we predict protein expression using the SPARTAN cell type model on PBMC (NextGEM) and measure protein expression using the PBMC (V3 Chemistry) resource.

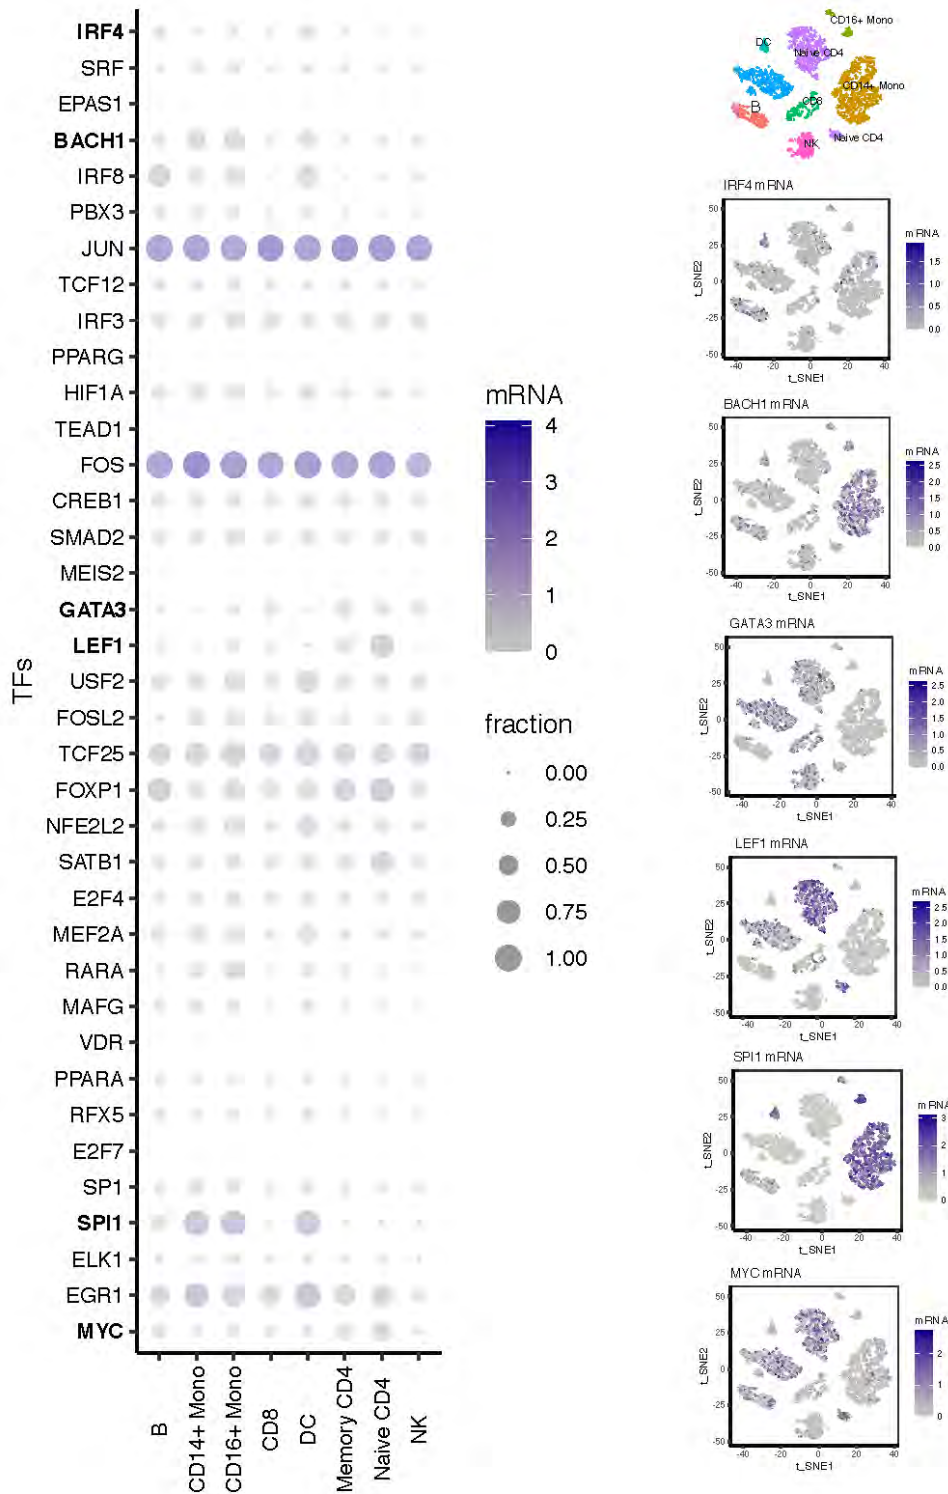

**Supplementary Fig. 5:** Dot plot showing the median TF mRNA expression z-score of TFs across different PBMC cell-types. The dot size indicates a fraction of cells each TF is identified as a significant regulator within each cell-type from inferred TF activities (**Fig 1E**). t-SNE on the inferred TF activity matrix. Cells are colored according to major cell types. IRF4, BACH1, GATA3, LEF1, SPI1 and MYC mRNA expression overlay on t-SNE of TF activities.

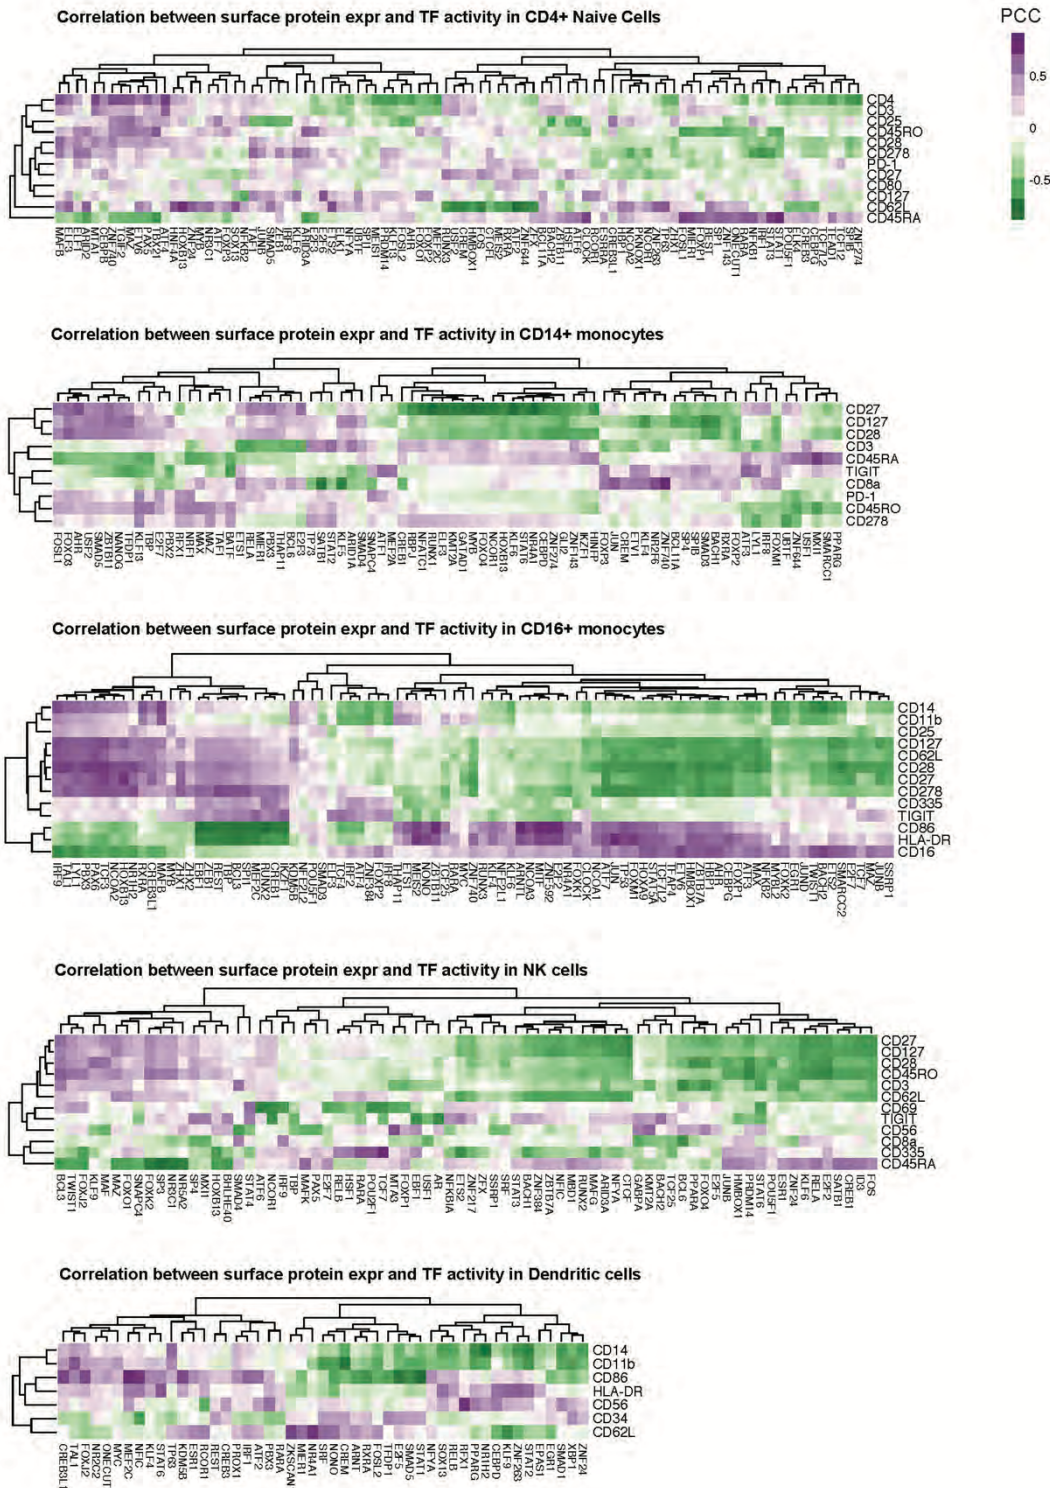

**Supplementary Fig. 6:** Heatmap revealing correlations between inferred TF activities of cells (columns) and surface protein expression (rows) in CD4<sup>+</sup> naive T cells, CD14<sup>+</sup> monocytes, CD16<sup>+</sup> monocytes, NK and Dendritic cells. For clarity, surface proteins with pairwise Pearson correlation values with TFs below 0.75 are filtered, and then the union of the top 10 most correlated TFs with each surface is shown for each cell type.

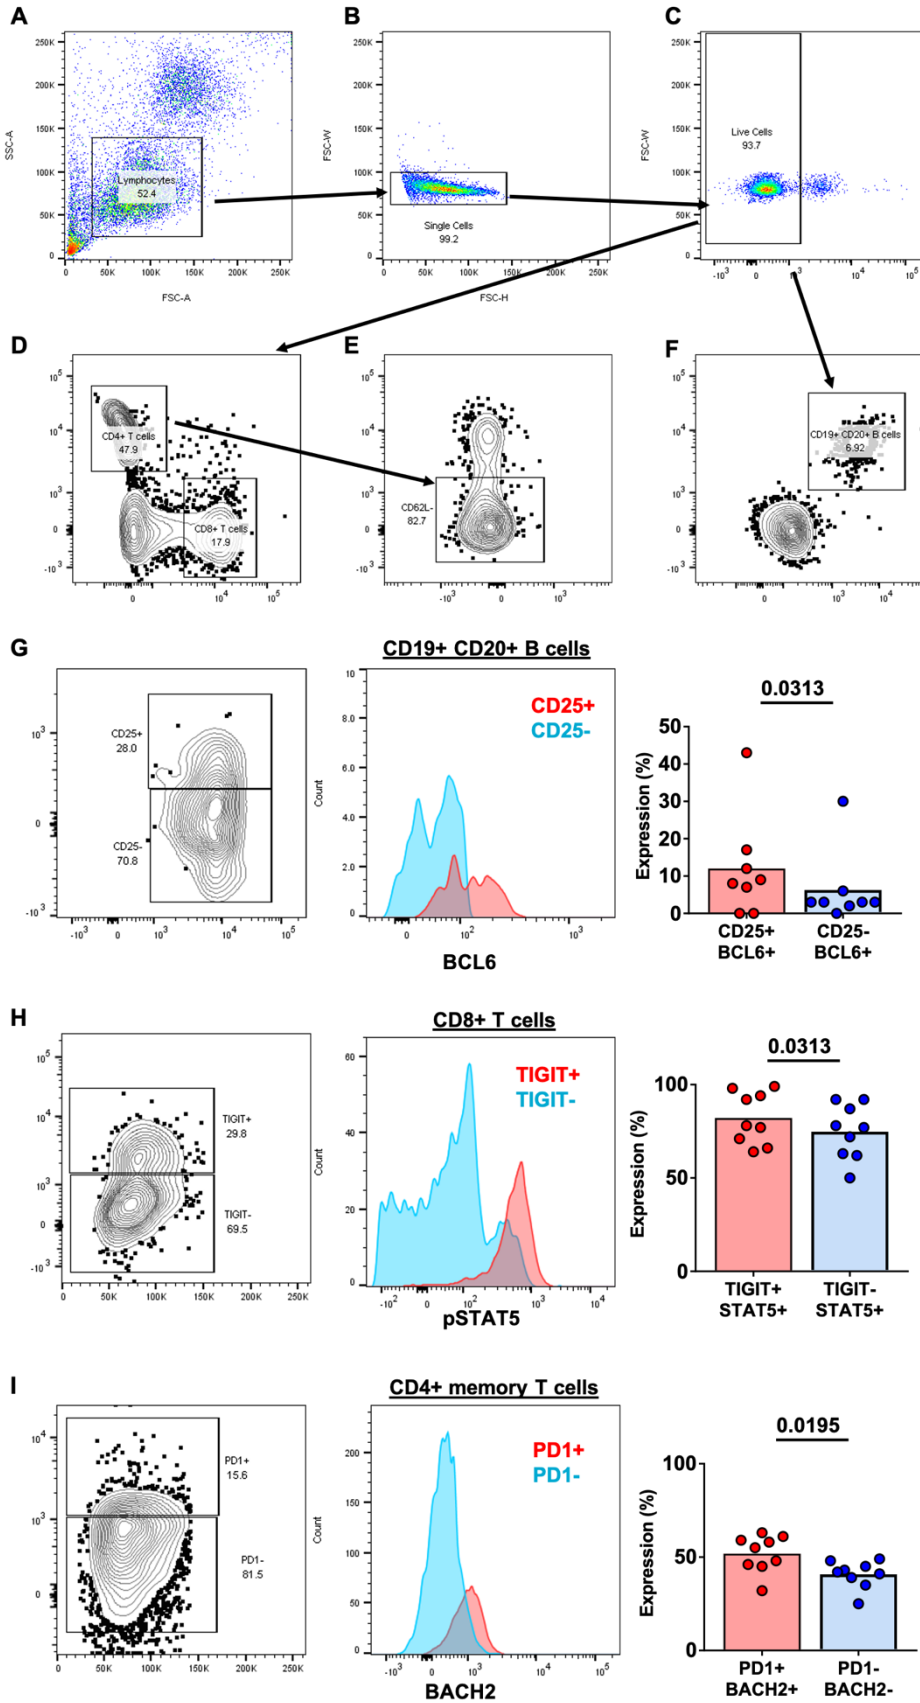

**Supplementary Fig. 7:** Flow cytometric analysis and validation of inferred TF activity and surface protein expression associations in healthy donor PBMCs. **(A)** Gating strategy representations of lymphocytes, **(B)** singlets, **(C)** live cells, **(D)** CD4<sup>+</sup> T cells and CD8<sup>+</sup> T cells followed by **(E)** memory definition of CD62L<sup>-</sup> CD45RA<sup>-</sup> CD4<sup>+</sup> T cells, and **(F)** CD19<sup>+</sup>CD20<sup>+</sup> B cells. **(G)** Representative flow gating of CD25 in B cells, along with representative histograms of BCL6 in the populations and distribution across samples (n=8). **(H)** Representative flow gating of TIGIT in CD8<sup>+</sup> T cells, along with representative histograms of pSTAT5 in the populations and distribution across samples (n=9). **(I)** Representative flow gating of PD-1 in CD4<sup>+</sup> memory T cells, along with representative histograms of BACH2 in populations and distribution across samples (n=9).



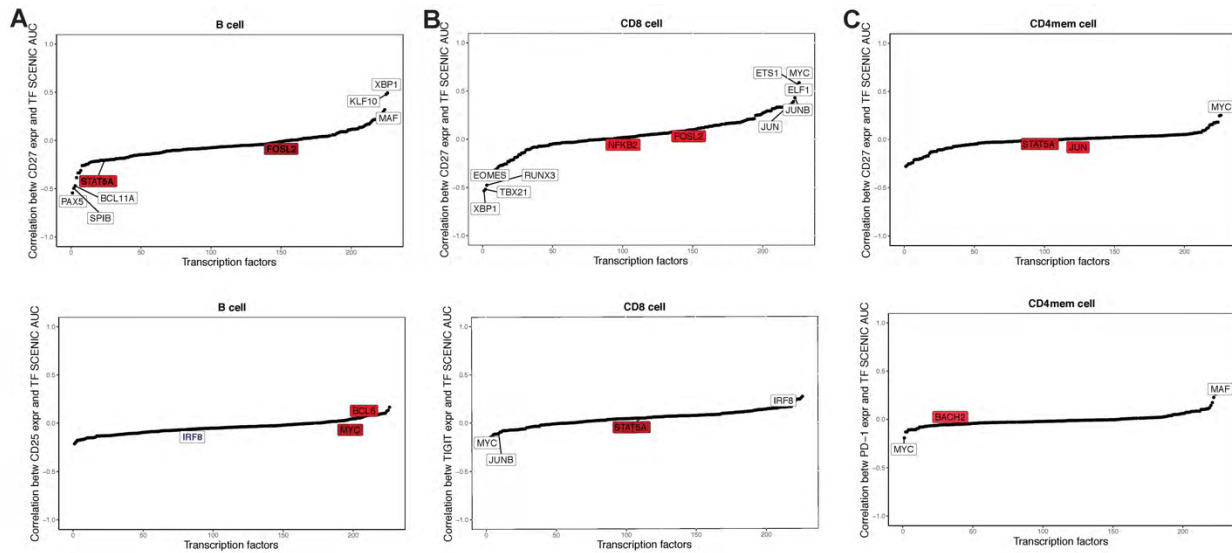

**Supplementary Fig. 8:** Correlation between **(A)** CD27 (top) CD25 (bottom) protein expression and SCENIC regulon activities across B cells; **(B)** CD27 (top) TIGIT (bottom) protein expression and SCENIC regulon activities across CD8<sup>+</sup> T cells; **(C)** CD27 (top) PD-1 (bottom) protein expression and SCENIC regulon activities across CD4<sup>+</sup> memory T cells.

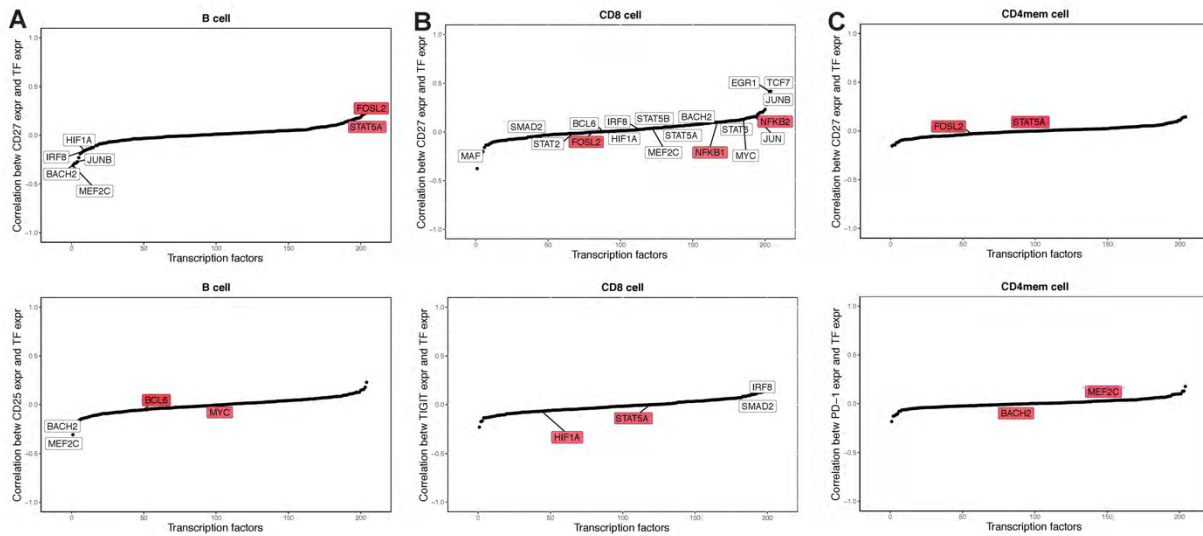

**Supplementary Fig. 9:** Correlation between (A) CD27 (top) CD25 (bottom) protein expression and TF mRNA expression across B cells; (B) CD27 (top) TIGIT (bottom) protein expression and TF mRNA expression across CD8<sup>+</sup> T cells; (C) CD27 (top) PD-1 (bottom) protein expression and mRNA expression across CD4<sup>+</sup> memory T cells.

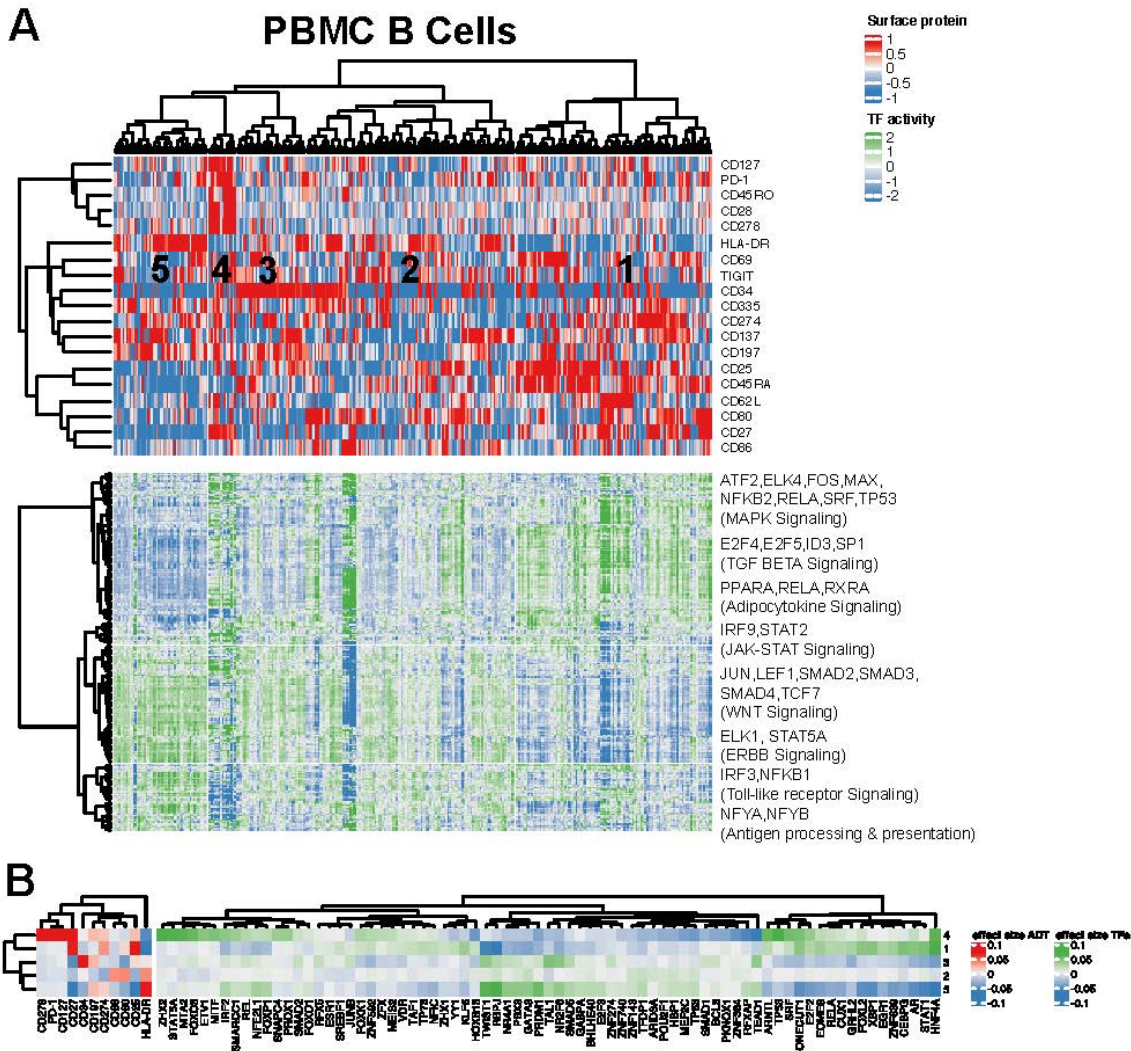

**Supplementary Fig. 10: (A)** We trained a SPaRTAN model on 332 B cells from the 10x Genomics PBMC CITE-seq dataset. The top heatmap shows cells clustered by the surface protein expression (excluding cell lineage maker surface proteins). The bottom panel shows inferred TF activities for each cell based on clustering by surface protein expression. **(B)** Heatmap shows the mean surface protein expression and inferred TF activity between cells in a given cluster vs. those in all other clusters. For each comparison, the absolute value of the mean surface protein expression and inferred TF activity (effect sizes) are ranked and the union of the top 10 TFs for each comparison is shown in the heatmap.

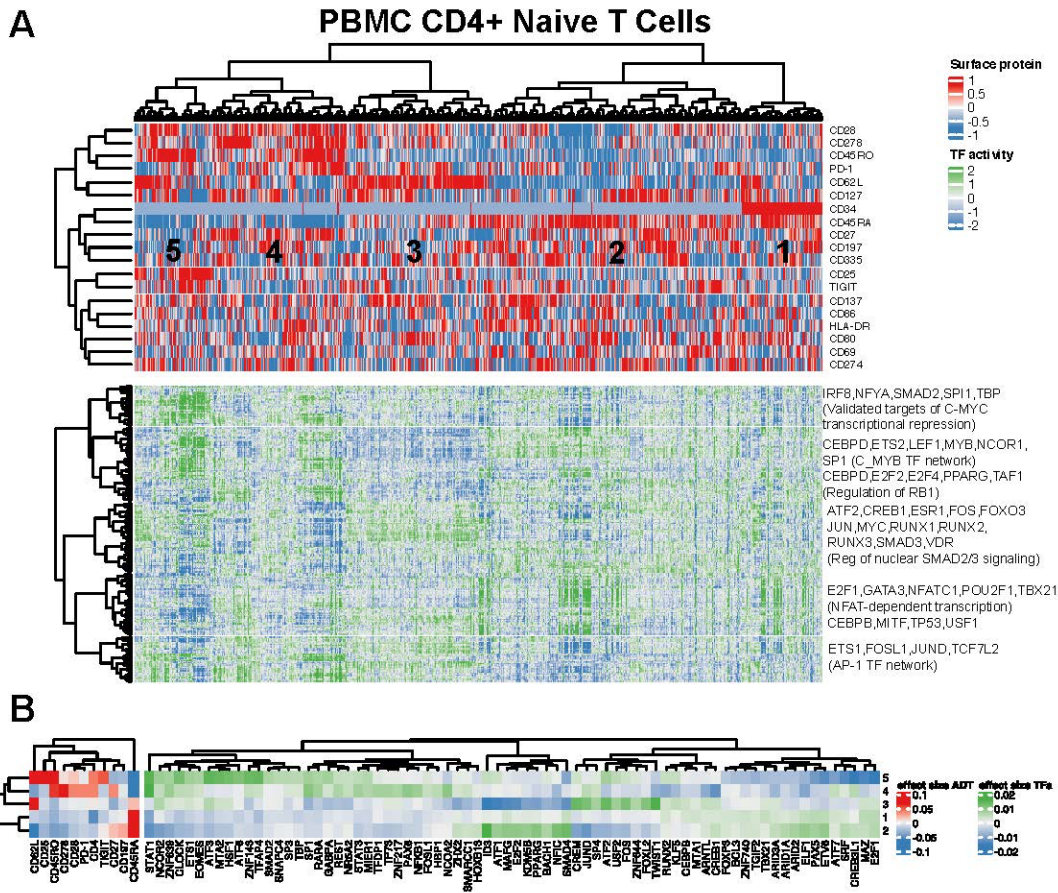

**Supplementary Fig. 11: (A)** We trained a SPaRTAN model on 910 CD4<sup>+</sup> naive T cells from the 10x Genomics PBMC CITE-seq dataset. The top heatmap shows cells clustered by the surface protein expression (excluding cell lineage maker surface proteins) The bottom panel shows inferred TF activities for each cell based on clustering by surface protein expression. **(B)** Heatmap shows the mean surface protein expression and inferred TF activity between cells in a given cluster vs. those in all other clusters. For each comparison, the absolute value of the mean surface protein expression and inferred TF activity (effect sizes) are ranked and the union of the top 10 TFs for each comparison is shown in the heatmap.

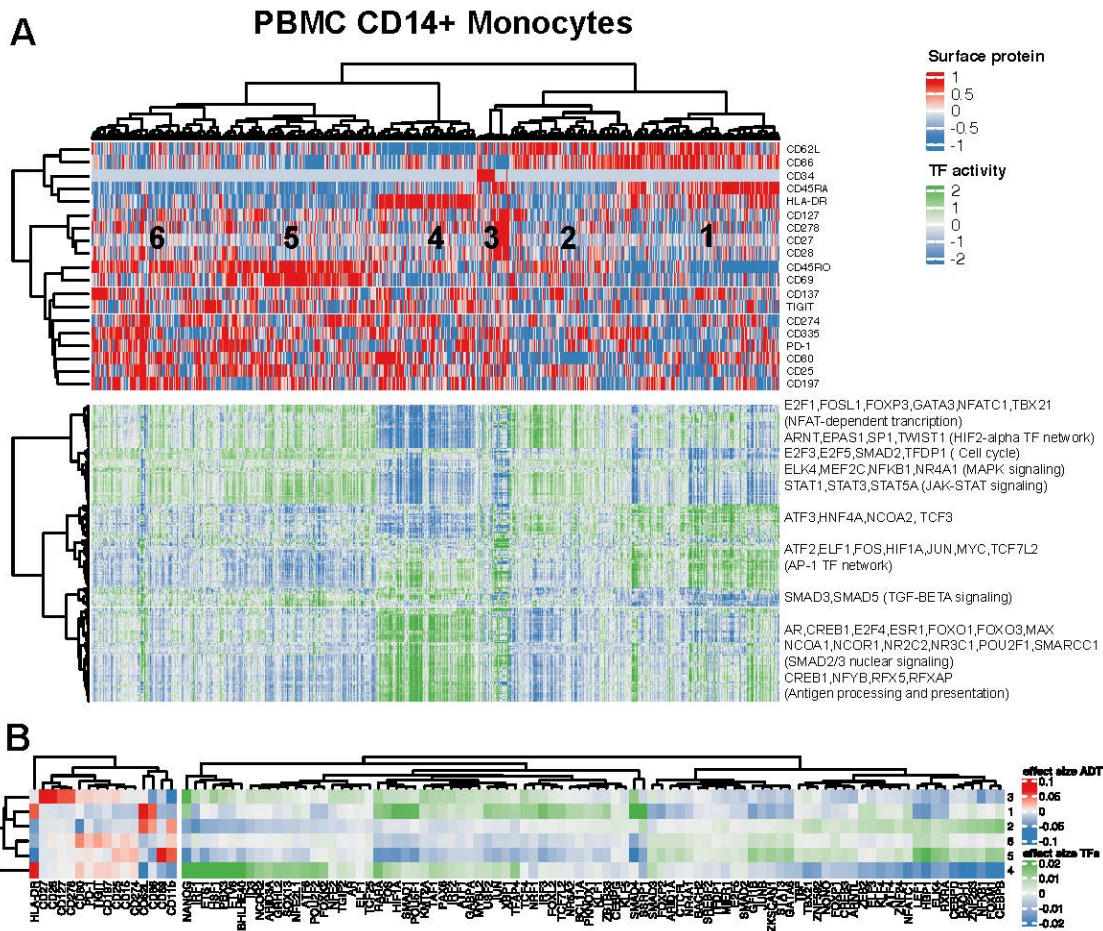

**Supplementary Fig. 12: (A)** We trained a SPaRTAN model on 1203 CD14<sup>+</sup> monocytes from the 10x Genomics PBMC CITE-seq dataset. The top heat map shows cells clustered by the surface protein expression (excluding cell lineage maker surface proteins) The bottom panel shows inferred TF activities for each cell based on clustering by surface protein expression. **(B)** Heatmap shows the mean surface protein expression and inferred TF activity between cells in a given cluster vs. those in all other clusters. For each comparison, the absolute value of the mean surface protein expression and inferred TF activity (effect sizes) are ranked and the union of the top 10 TFs for each comparison is shown in the heatmap.

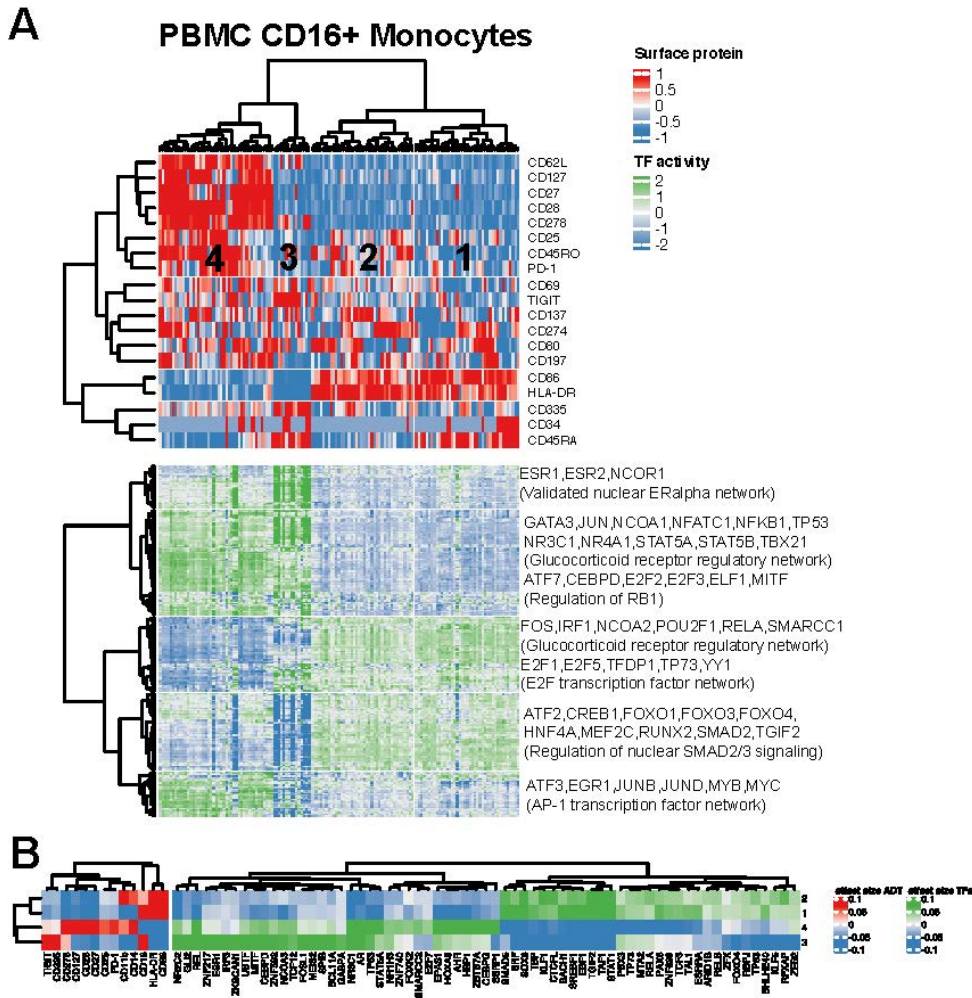

**Supplementary Fig. 13: (A)** We trained a SPARTAN model on 140 CD16<sup>+</sup> monocytes cells from the 10x Genomics PBMC CITE-seq dataset. The top heatmap shows cells clustered by the surface protein expression (excluding cell lineage maker surface proteins) The bottom panel shows inferred TF activities for each cell based on clustering by surface protein expression. **(B)** Heatmap shows the mean surface protein expression and inferred TF activity between cells in a given cluster vs. those in all other clusters. For each comparison, the absolute value of the mean surface protein expression and inferred TF activity (effect sizes) are ranked and the union of the top 10 TFs for each comparison is shown in the heatmap.

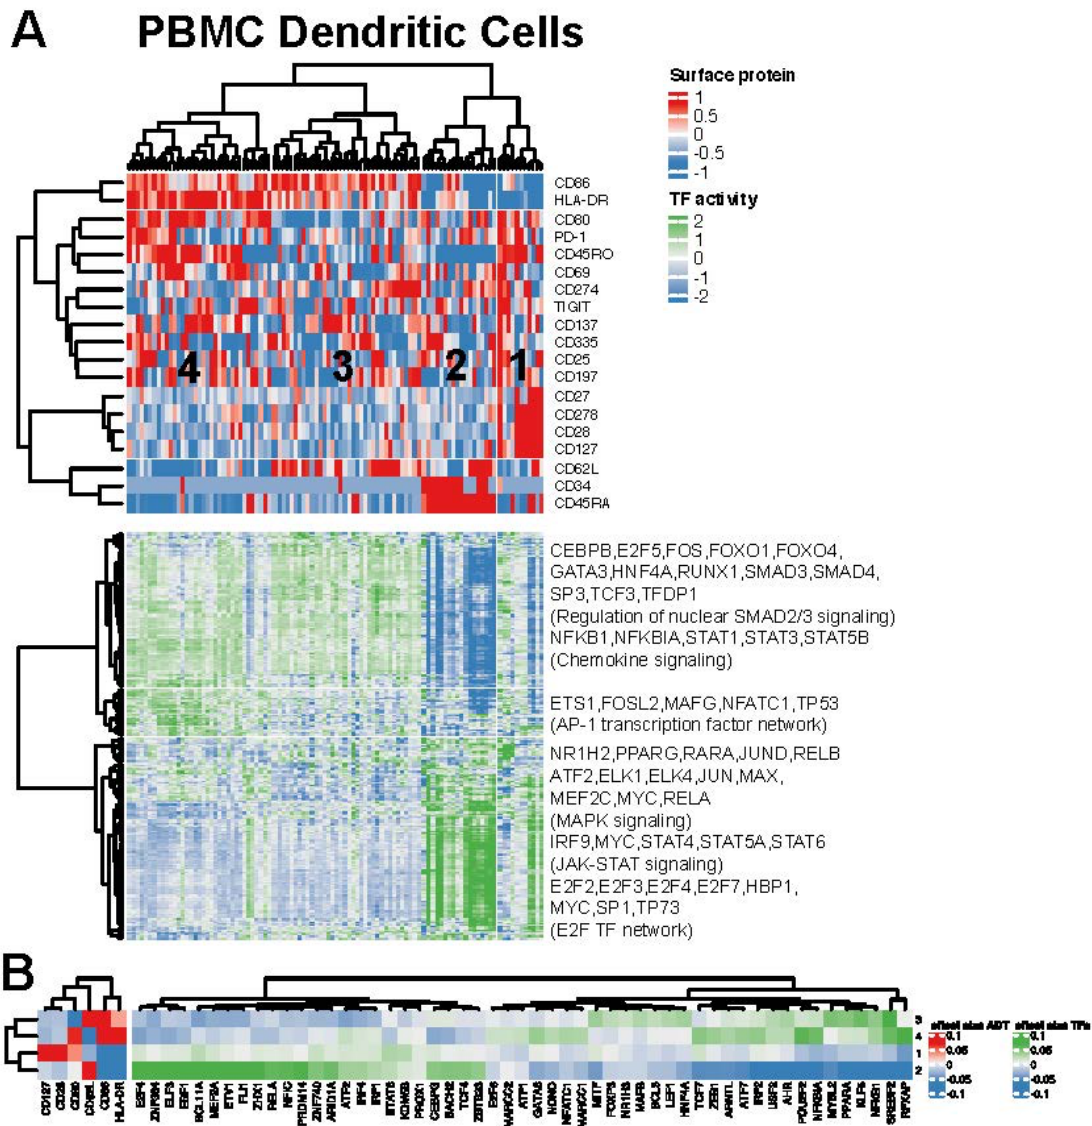

**Supplementary Fig. 14: (A)** We trained a SPARTAN model on 100 dendritic cells from the 10x Genomics PBMC CITE-seq dataset. The top heatmap shows cells clustered by the surface protein expression (excluding cell lineage maker surface proteins) The bottom panel shows inferred TF activities for each cell based on clustering by surface protein expression. **(B)** Heatmap shows the mean surface protein expression and inferred TF activity between cells in a given cluster vs. those in all other clusters. For each comparison, the absolute value of the mean surface protein expression and inferred TF activity (effect sizes) are ranked and the union of the top 10 TFs for each comparison is shown in the heatmap.

**A**

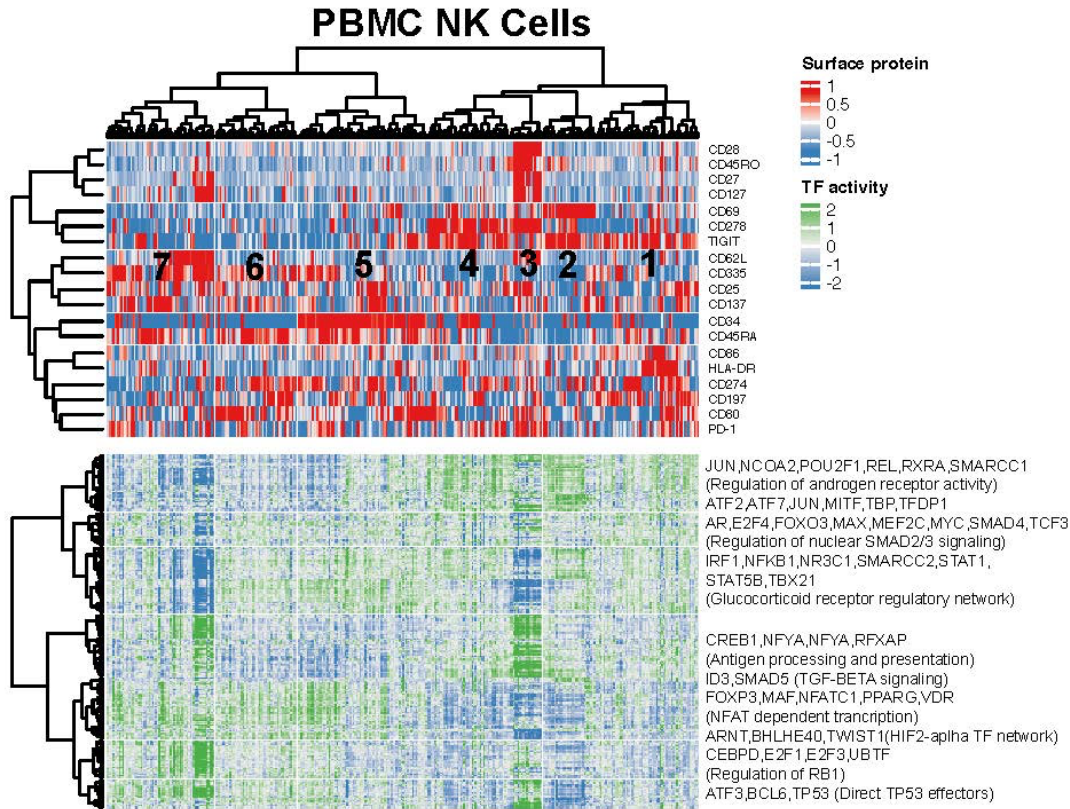

**B**

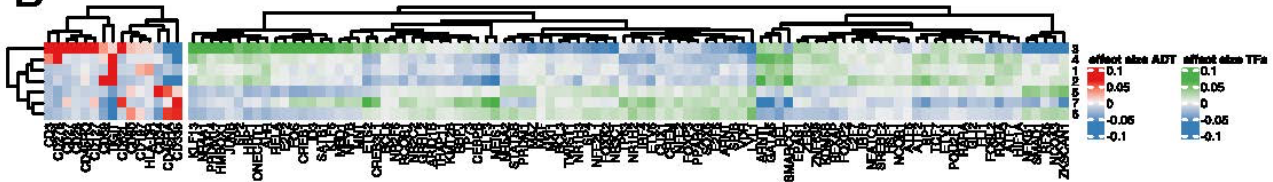

**Supplementary Fig. 15: (A)** We trained a SPaRTAN model on 353 NK cells from the 10x Genomics PBMC CITE-seq dataset. The top heatmap shows cells clustered by the surface protein expression (excluding cell lineage maker surface proteins) The bottom panel shows inferred TF activities for each cell based on clustering by surface protein expression. **(B)** Heatmap shows the mean surface protein expression and inferred TF activity between cells in a given cluster vs. those in all other clusters. For each comparison, the absolute value of the mean surface protein expression and inferred TF activity (effect sizes) are ranked and the union of the top 10 TFs for each comparison is shown in the heatmap.



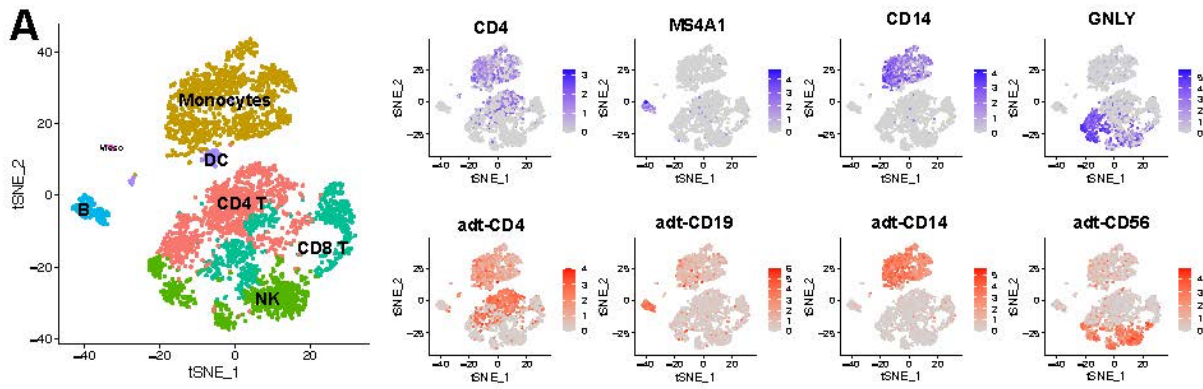

**Supplementary Fig. 16:** Transcriptome-based clustering of 4,005 CITE-seq single-cell expression profiles of malignant peritoneal mesothelioma (MPeM) reveals distinct cell populations. Cell types can be discerned by marker gene expression. B, B cells; CD4 T, CD4<sup>+</sup> T cells; CD8 T, CD8<sup>+</sup> T cells; NK, natural killer cells; Monocytes; DC, dendritic cells. mRNA (blue) and corresponding ADT (red) signal for the CITE-seq antibody panel projected on the t-SNE plot from the panel.

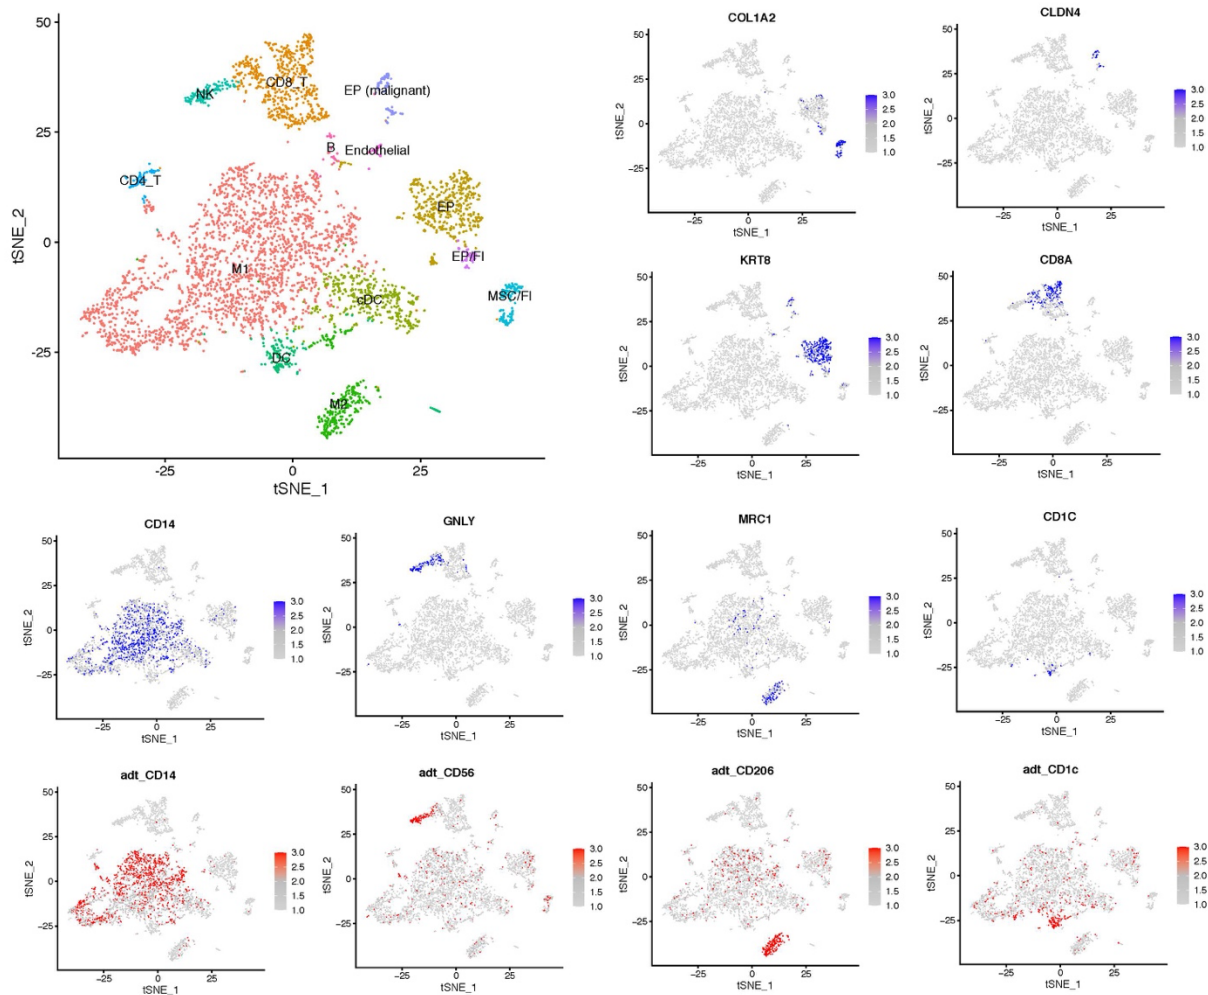

**Supplementary Fig. 17:** Transcriptome-based clustering of 4,912 CITE-seq single-cell expression profiles of malignant pleural mesothelioma (MPM) reveals distinct cell populations. Cell types can be discerned by marker gene expression. B, B cells; CD4 T, CD4<sup>+</sup> T cells; CD8 T, CD8<sup>+</sup> T cells; NK, natural killer cells; M1, M1 Macrophages; M2, M2 Macrophages; DC, dendritic cells; cDC, conventional DC; EP (malignant), epithelial malignant cells; Endothelial; EP, epithelial; EP/FI, epithelial and fibroblast; MSC/FI, mesenchymal stem cell and fibroblast. mRNA (blue) and corresponding ADT (red) signal for the CITE-seq antibody panel projected on the t-SNE plot from the panel.

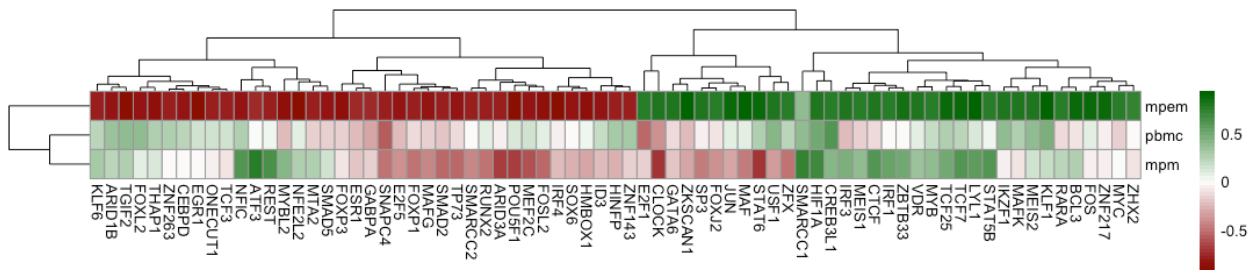

**Supplementary Fig. 18:** Heatmap revealing correlations between inferred TF activities of cells (columns) and PD-1 protein expression in PBMC, MPM and MPeM CD8<sup>+</sup> T cells. For clarity, TFs with pairwise Pearson correlation values with PD-1 below 0.75 in at least one tissue type are filtered.

## Supplementary Tables

**Supplementary Table 1.** Summary of datasets used in this study

| Dataset                       | Summary                                                                                                      | Reference                                                                                                                                                                                                                 |
|-------------------------------|--------------------------------------------------------------------------------------------------------------|---------------------------------------------------------------------------------------------------------------------------------------------------------------------------------------------------------------------------|
| CITE-seq (validation dataset) | 5k Peripheral blood mononuclear cells (PBMCs) from a healthy donor with cell surface proteins (v3 chemistry) | <a href="https://support.10xgenomics.com/single-cell-gene-expression/datasets/3.1.0/5k_pbmc_protein_v3">https://support.10xgenomics.com/single-cell-gene-expression/datasets/3.1.0/5k_pbmc_protein_v3</a>                 |
| CITE-seq (training dataset)   | 5k Peripheral blood mononuclear cells (PBMCs) from a healthy donor with cell surface proteins (Next GEM)     | <a href="https://support.10xgenomics.com/single-cell-gene-expression/datasets/3.1.0/5k_pbmc_protein_v3_nextgem">https://support.10xgenomics.com/single-cell-gene-expression/datasets/3.1.0/5k_pbmc_protein_v3_nextgem</a> |
| CITE-seq (tumor dataset)      | Malignant peritoneal mesothelioma                                                                            | GSE accession number pending                                                                                                                                                                                              |
| CITE-seq (tumor dataset)      | Malignant pleural mesothelioma                                                                               | GSE accession number pending                                                                                                                                                                                              |
| DoRothEA database             | Curated TF target-gene interaction                                                                           | Garcia-Alonso et al.(1)                                                                                                                                                                                                   |

**Supplementary Table 2.** Pathway enrichment analysis for correlated TF-surface protein pairs across cell types using SPaRTAN and SCENIC frameworks

| Cell type                       | P-value - SPaRTAN | P-value - SCENIC |
|---------------------------------|-------------------|------------------|
| B cells                         | <b>3.0e-06</b>    | 0.205            |
| CD14 <sup>+</sup> Monocytes     | <b>2.38e-19</b>   | 0.185            |
| CD16 <sup>+</sup> Monocytes     | <b>0.0126</b>     | <b>0.0037</b>    |
| CD4 <sup>+</sup> Memory T cells | 0.679             | 0.76             |
| CD4 <sup>+</sup> Naïve T cells  | <b>0.014</b>      | 0.51             |
| CD8 <sup>+</sup> T cells        | 0.524             | 0.24             |
| DC                              | <b>9.59e-25</b>   | <b>1.92e-08</b>  |
| NK                              | 0.996             | 0.124            |

**Supplementary Table 3.** List of ab markers and clone for flow cytometry validation

| <b>Antigen</b>      | <b>Clone</b> | <b>Catalog number</b> | <b>Company</b>    |
|---------------------|--------------|-----------------------|-------------------|
| CD8-BUV395          | RPA-TA       | 563795                | BD Biosciences    |
| CD4-BUV737          | SK3          | 612748                | BD Biosciences    |
| TIGIT- BV421        | A15153G      | 372709                | Biologend         |
| CD2-BV650           | LG.3A10      | 124233                | Biologend         |
| CD28-BV711          | BC96         | 302635                | Biologend         |
| CD45RA-BV785        | HI100        | 304139                | Biologend         |
| CD25-BV711          | 2A3          | 563159                | BD Biosciences    |
| CD20-BUV395         | 2H7          | 563781                | BD Biosciences    |
| CD19-BUV737         | SJ25C1       | 612756                | BD Biosciences    |
| HLA-DR-PerCP-Cy5.5  | L243         | 339194                | BD Biosciences    |
| PD-1-PerCP-Cy5.5    | EH12.1       | 561273                | BD Biosciences    |
| cMAF-PE             | sym0F1       | 12-9855-42            | Thermo Fisher     |
| IRF8-PE             | H31-644      | 566373                | BD Biosciences    |
| pSTAT5-PE-efluor610 | SRBCZX       | 61-9010-42            | Thermo Fisher     |
| pSTAT6-PE-eFluro610 | CHI2S4N      | 61-9013-41            | Thermo Fisher     |
| HIF1a-AF488         | 546-16       | 359707                | Biologend         |
| BATHC2              | 16B10B53     | 695602                | Biologend         |
| MEF2c               | OTI4F7       | MA5-25477             | Thermo Fisher     |
| pSTAT2              | D3P2P        | 88410S                | Cell Signaling    |
| c-MYC               | 9E10         | NB600302SS            | Fisher Scientific |
| FOSL2               | 2B2          | H00002355-M03         | Thermo Fisher     |
| Smad2               | D43B4        | 5339T                 | Cell Signaling    |
| BCL-6 PE-Cy7        | K112-91      | 563582                | BD Biosciences    |
| NFkB                | 5D10D11      | MA5-15870             | Thermo Fisher     |
| JunB                | 512313       | MAB4456-SP            | R&D Systems       |

**Supplementary Table 4** – Pearson correlation coefficient between inferred TF activity and PD-1 expression in MPeM, MPM and PBMC CD8<sup>+</sup> T cells.

| TF      | MPeM CD8 <sup>+</sup> T cells | MPM CD8 <sup>+</sup> T cells | PBMC CD8 <sup>+</sup> T cells |
|---------|-------------------------------|------------------------------|-------------------------------|
| JUN     | 0.90                          | -0.31                        | 0.09                          |
| FOS     | 0.90                          | -0.07                        | 0.07                          |
| PBX3    | -0.64                         | -0.08                        | -0.06                         |
| MYC     | 0.77                          | 0.02                         | -0.16                         |
| RARA    | 0.78                          | 0.22                         | -0.13                         |
| SMAD2   | -0.79                         | -0.54                        | -0.21                         |
| VDR     | 0.82                          | 0.37                         | 0.07                          |
| SP1     | -0.73                         | 0.68                         | 0.22                          |
| RFX5    | 0.69                          | 0.52                         | 0.27                          |
| ETS1    | 0.70                          | -0.29                        | -0.32                         |
| EPAS1   | -0.61                         | -0.52                        | -0.31                         |
| E2F4    | -0.65                         | 0.00                         | 0.25                          |
| NFE2L2  | -0.91                         | 0.26                         | 0.06                          |
| HIF1A   | 0.80                          | 0.69                         | 0.51                          |
| TCF25   | 0.90                          | 0.52                         | 0.29                          |
| CTCF    | 0.80                          | 0.61                         | -0.13                         |
| MEF2A   | -0.63                         | -0.46                        | -0.20                         |
| MEF2C   | -0.82                         | -0.59                        | 0.17                          |
| GATA3   | 0.67                          | 0.35                         | -0.42                         |
| MYB     | 0.78                          | 0.37                         | 0.18                          |
| E2F1    | 0.77                          | -0.17                        | -0.53                         |
| STAT1   | 0.65                          | -0.33                        | 0.24                          |
| EBF1    | -0.21                         | 0.67                         | 0.41                          |
| RBPJ    | -0.68                         | -0.22                        | 0.07                          |
| IRF4    | -0.92                         | -0.23                        | -0.04                         |
| FOXP1   | -0.77                         | -0.48                        | -0.14                         |
| ESR1    | -0.76                         | -0.20                        | -0.25                         |
| RELA    | -0.10                         | -0.60                        | -0.35                         |
| MITF    | 0.68                          | 0.13                         | -0.34                         |
| ONECUT1 | -0.79                         | -0.04                        | 0.14                          |
| LEF1    | 0.72                          | 0.54                         | -0.24                         |
| MAFF    | 0.25                          | 0.63                         | 0.00                          |
| MAFG    | -0.83                         | -0.43                        | -0.18                         |
| PBX2    | -0.62                         | 0.42                         | -0.17                         |
| MEIS2   | 0.82                          | 0.14                         | 0.37                          |
| THAP11  | 0.23                          | 0.62                         | -0.08                         |
| SOX6    | -0.82                         | -0.27                        | -0.01                         |

|        |       |       |       |
|--------|-------|-------|-------|
| EGR1   | -0.90 | -0.03 | 0.14  |
| SRF    | 0.72  | 0.44  | -0.20 |
| ATF1   | -0.60 | -0.66 | -0.45 |
| ELK1   | -0.68 | -0.48 | 0.34  |
| RELB   | -0.67 | -0.59 | -0.53 |
| FOXO1  | -0.66 | -0.62 | -0.20 |
| IRF1   | 0.77  | 0.54  | -0.03 |
| CEBPB  | 0.67  | 0.00  | -0.02 |
| REL    | 0.74  | -0.51 | -0.36 |
| ZNF263 | -0.80 | -0.02 | 0.26  |
| YY1    | 0.67  | 0.53  | -0.24 |
| FOXM1  | -0.72 | -0.28 | 0.23  |
| TBP    | 0.69  | -0.05 | -0.22 |
| NR5A2  | 0.62  | -0.20 | 0.40  |
| RFX1   | 0.74  | -0.57 | -0.53 |
| IRF3   | 0.80  | 0.46  | -0.22 |
| USF1   | 0.82  | -0.33 | 0.42  |
| FOSL2  | -0.88 | -0.53 | 0.07  |
| SMAD3  | -0.60 | -0.09 | 0.08  |
| ESR2   | -0.70 | 0.15  | -0.16 |
| CEBPD  | -0.84 | -0.01 | 0.22  |
| NFKB2  | 0.46  | 0.41  | 0.61  |
| ZFX    | 0.77  | -0.48 | 0.22  |
| BCL3   | 0.89  | 0.25  | -0.09 |
| MYBL2  | -0.85 | 0.41  | -0.23 |
| RUNX1  | -0.71 | -0.49 | 0.07  |
| NFIC   | -0.84 | 0.60  | 0.26  |
| SP3    | 0.80  | -0.46 | -0.05 |
| AR     | 0.70  | -0.35 | -0.20 |
| NFYB   | -0.64 | 0.65  | -0.05 |
| SREBF1 | 0.64  | 0.09  | 0.03  |
| E2F6   | 0.42  | 0.62  | 0.07  |
| TP73   | -0.82 | -0.55 | -0.13 |
| CREB3  | 0.72  | 0.64  | -0.23 |
| FOXP3  | -0.87 | -0.09 | -0.18 |
| BACH2  | -0.63 | 0.02  | -0.09 |
| TP63   | -0.64 | -0.04 | -0.29 |
| ATF7   | -0.48 | -0.65 | 0.02  |
| STAT3  | -0.73 | -0.24 | 0.29  |
| FLI1   | -0.69 | 0.12  | 0.03  |

|         |       |       |       |
|---------|-------|-------|-------|
| AHR     | 0.07  | -0.61 | -0.37 |
| ELK4    | -0.68 | -0.09 | -0.26 |
| STAT6   | 0.89  | -0.71 | 0.29  |
| FOXL2   | -0.83 | 0.08  | 0.38  |
| SMARCC2 | -0.78 | -0.43 | 0.00  |
| GATA6   | 0.82  | -0.21 | -0.13 |
| ATF3    | -0.75 | 0.77  | 0.01  |
| KLF6    | -0.80 | 0.32  | 0.23  |
| HINFP   | -0.78 | -0.29 | 0.31  |
| HMBOX1  | -0.87 | -0.33 | 0.03  |
| LYL1    | 0.93  | 0.58  | 0.10  |
| TCF7    | 0.87  | 0.62  | 0.22  |
| RFXAP   | 0.23  | 0.69  | -0.10 |
| POU5F1  | -0.90 | -0.69 | 0.12  |
| FOXK2   | -0.66 | -0.48 | 0.40  |
| RUNX2   | -0.77 | -0.50 | 0.06  |
| THAP1   | -0.87 | 0.12  | 0.29  |
| NR2F6   | 0.60  | 0.66  | 0.05  |
| KLF5    | 0.62  | 0.17  | -0.17 |
| FOSL1   | -0.65 | -0.63 | -0.37 |
| TCF3    | -0.81 | -0.08 | 0.17  |
| NRF1    | -0.71 | 0.53  | -0.58 |
| ZBTB33  | 0.86  | 0.49  | -0.03 |
| IKZF1   | 0.80  | -0.07 | 0.39  |
| SNAPC4  | -0.78 | -0.48 | -0.58 |
| MEIS1   | 0.79  | 0.39  | -0.16 |
| STAT5B  | 0.79  | 0.63  | 0.05  |
| MNT     | 0.07  | -0.72 | -0.09 |
| ZBED1   | 0.46  | -0.73 | 0.28  |
| ZHX2    | 0.75  | -0.07 | -0.02 |
| TWIST1  | 0.61  | -0.11 | 0.41  |
| ZKSCAN1 | 0.95  | -0.31 | -0.25 |
| REST    | -0.79 | 0.64  | 0.03  |
| NCOA1   | -0.71 | -0.32 | -0.17 |
| NCOR2   | -0.23 | -0.35 | -0.74 |
| CLOCK   | 0.79  | -0.71 | -0.38 |
| ARID1B  | -0.82 | 0.23  | 0.36  |
| TFAP4   | 0.62  | 0.26  | 0.03  |
| SMAD1   | 0.72  | 0.31  | -0.34 |
| GABPA   | -0.76 | -0.17 | -0.33 |



|         |       |       |       |
|---------|-------|-------|-------|
| ETV6    | -0.70 | -0.09 | -0.07 |
| TFDP1   | 0.52  | 0.61  | -0.06 |
| NR2C2   | 0.67  | -0.18 | 0.15  |
| SP4     | 0.57  | 0.65  | 0.10  |
| E2F5    | -0.85 | -0.39 | -0.26 |
| MAFK    | 0.80  | -0.08 | 0.27  |
| MAF     | 0.93  | -0.45 | 0.08  |
| KLF13   | 0.72  | 0.23  | -0.59 |
| CREB3L1 | 0.76  | 0.43  | 0.63  |
| NCOA2   | -0.72 | 0.40  | 0.46  |
| KLF1    | 0.92  | 0.20  | 0.46  |
| MTA2    | -0.79 | 0.28  | -0.17 |
| SOX13   | 0.74  | -0.52 | 0.30  |
| FOXJ2   | 0.78  | -0.38 | -0.09 |
| ARID3A  | -0.80 | -0.69 | -0.06 |
| ID3     | -0.81 | -0.24 | 0.18  |
| ZNF143  | -0.78 | -0.16 | 0.30  |
| ZNF217  | 0.89  | -0.07 | -0.06 |
| EOMES   | -0.66 | 0.48  | -0.11 |
| MIER1   | -0.66 | 0.50  | -0.31 |
| SMARCC1 | 0.38  | 0.75  | 0.39  |
| SMAD5   | -0.82 | 0.13  | -0.15 |
| TGIF2   | -0.92 | 0.27  | 0.37  |

## SI References

1. L. Garcia-Alonso, C. H. Holland, M. M. Ibrahim, D. Turei, J. Saez-Rodriguez, Benchmark and integration of resources for the estimation of human transcription factor activities. *Genome Res* **29**, 1363-1375 (2019).
